# Supplementary material
Source: PubMed Central journal article supplement (PMC4963983)
Supplement: JZS-54-177-s001.pdf [file JZS-54-177-s001.pdf]

## Supplementary Information

<sup>1</sup> *Department of Integrative Zoology, University of Vienna, UZA1 Althanstrasse 14, 1090 Vienna, Austria*

<sup>2</sup> *Laboratory of Cell Differentiation, A.V. Zhirmunsky Institute for Marine Biology, Far East Branch of the Russian Academy of Sciences, Paltchevsky ulica 17, 690041 Vladivostok, Russian Federation*

**A putative species complex in the Sea of Japan revealed by DNA sequence data: A study on *Lottia* cf. *kogamogai* (Gastropoda: Patellogastropoda)**

**ALEN KRISTOF<sup>1\*</sup>, ANDRÉ LUIZ DE OLIVEIRA<sup>1</sup>, KONSTANTIN G. KOLBIN<sup>2</sup> & ANDREAS WANNINGER<sup>1</sup>**

*\*Corresponding author: alen.kristof@univie.ac.at*

*Contributing authors: andre.l Luiz.de.oliveira@univie.ac.at; konstantin.kolbin@gmail.com;*

*andreas.wanninger@univie.ac.at*

**Table S1.** List of species and genes with GenBank accession numbers used for phylogenetic analyses

| Clade/Family             | Species                            | 16S      | CO1      | 18S      |
|--------------------------|------------------------------------|----------|----------|----------|
| <b>Patellogastropoda</b> |                                    |          |          |          |
| Nacellidae               | <i>Cellana nigrolineata</i>        | DQ093467 | AB548213 | DQ013353 |
|                          | <i>Cellana radiata</i>             | AB106478 | AB433647 | AB282768 |
|                          | <i>orientalis</i>                  |          |          |          |
|                          | <i>Cellana toreuma</i>             | GQ455937 | JQ313557 | AF308646 |
| Lepetidae                | <i>Lepeta caeca pacifica</i>       | AB238347 | AB543978 | AB282759 |
| Pectinodontidae          | <i>Bathyacmaea</i>                 | AB238451 | AB238588 | AB282772 |
|                          | <i>nipponica</i>                   |          |          |          |
|                          | <i>Pectinodonta rhyssa</i>         | AB238452 | AB238589 | AB282773 |
| Lottiidae                | <i>Erginus sybaritica</i>          | AB238350 | AB238461 | AB282761 |
|                          | <i>Lottia digitalis</i>            | AB238352 | KF643845 | DQ248942 |
|                          | <i>Lottia dorsuosa</i>             | AB106502 | KM221054 | AF308645 |
|                          | <i>Lottia fenestrata</i>           | FJ977695 | FJ977749 | FJ977631 |
|                          | <i>Lottia gigantea</i>             | FJ977696 | FJ977750 | FJ977632 |
|                          | <i>Lottia jamaicensis</i>          | FJ977697 | FJ977751 | FJ977633 |
|                          | <b><i>Lottia kogamogai</i></b>     | AB106493 | AB238467 | -        |
|                          | <b><i>Lottia cf. kogamogai</i></b> | KU053948 | KU053950 | KU053949 |
|                          | <i>Nipponacmea</i>                 | AB106511 | KM221077 | DQ013354 |
|                          | <i>concinna</i>                    |          |          |          |
|                          | <i>Nipponacmea</i>                 | AB106516 | AB238490 | AB282763 |
|                          | <i>nigrans</i>                     |          |          |          |
|                          | <i>Niveotectura pallida</i>        | AB106519 | AB238494 | AF308644 |
| <i>Testudinalia</i>      | FJ977694                           | FJ977748 | FJ977630 |          |
| <i>testudinalis</i>      |                                    |          |          |          |
| Neolepetopsidae          | <i>Eulepetopsis vitrea</i>         | DQ093468 | DQ093516 | DQ093427 |
| Patelloidinae            | <i>Patelloida pygmaea</i>          | AB161514 | AB196505 | AB282765 |
| Outgroup                 |                                    |          |          |          |
| <b>Scaphopoda</b>        |                                    |          |          |          |
| Dentaliidae              | <i>Antalis entalis</i>             | DQ280027 | DQ280016 | DQ279936 |
|                          | <i>Antalis</i>                     | DQ280026 | DQ280015 | DQ279935 |
|                          | <i>inaequicostata</i>              |          |          |          |

A

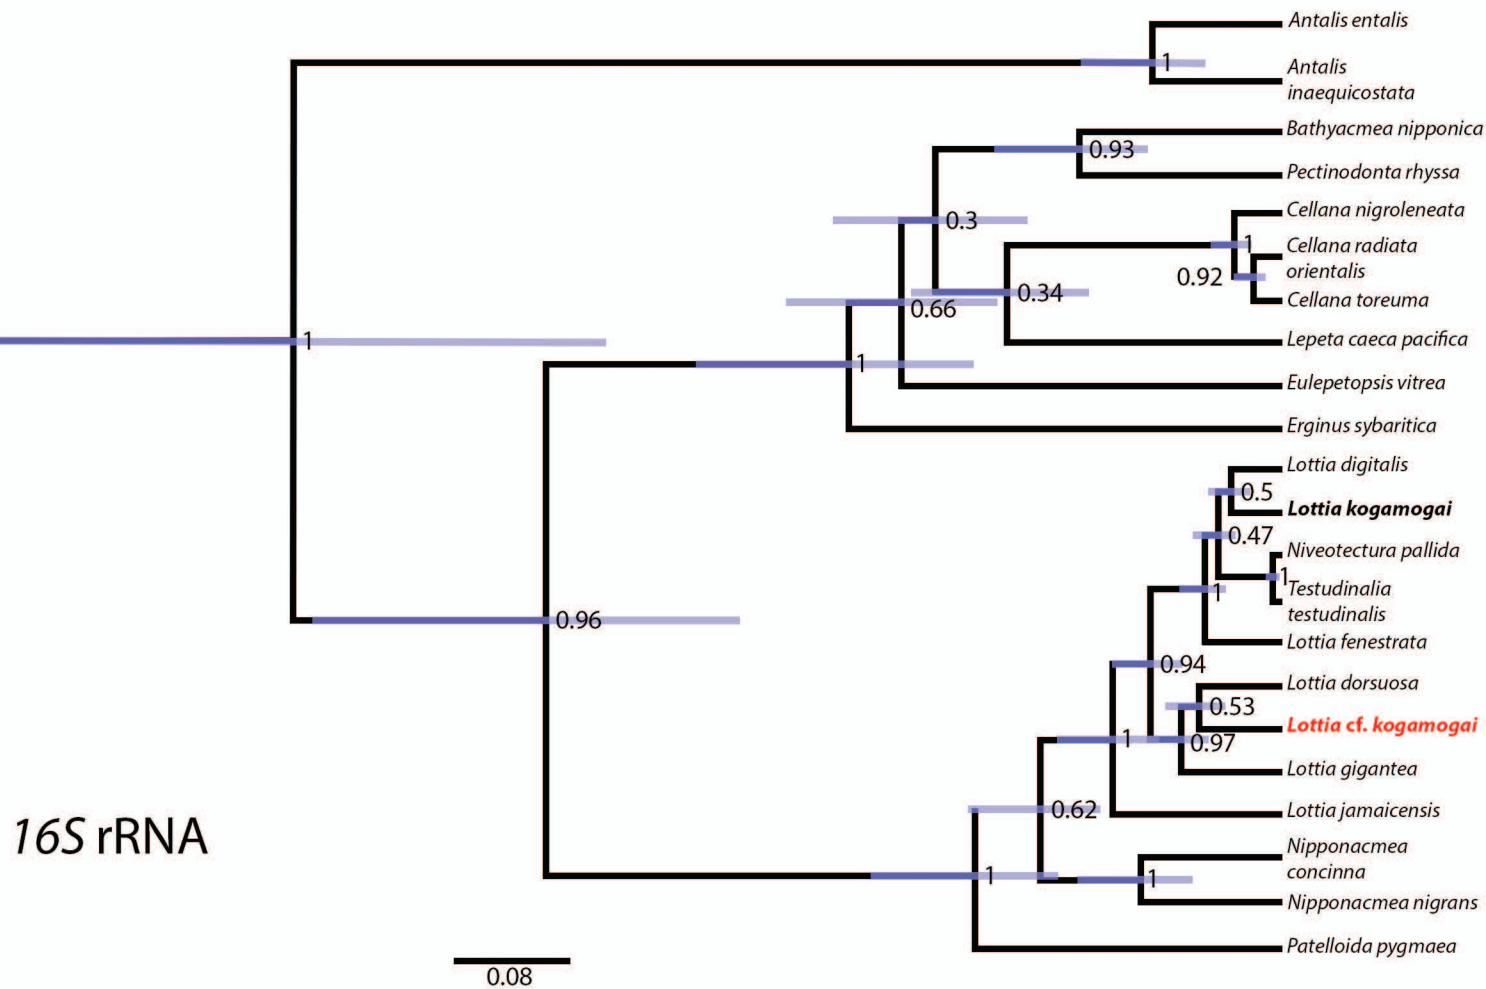

B

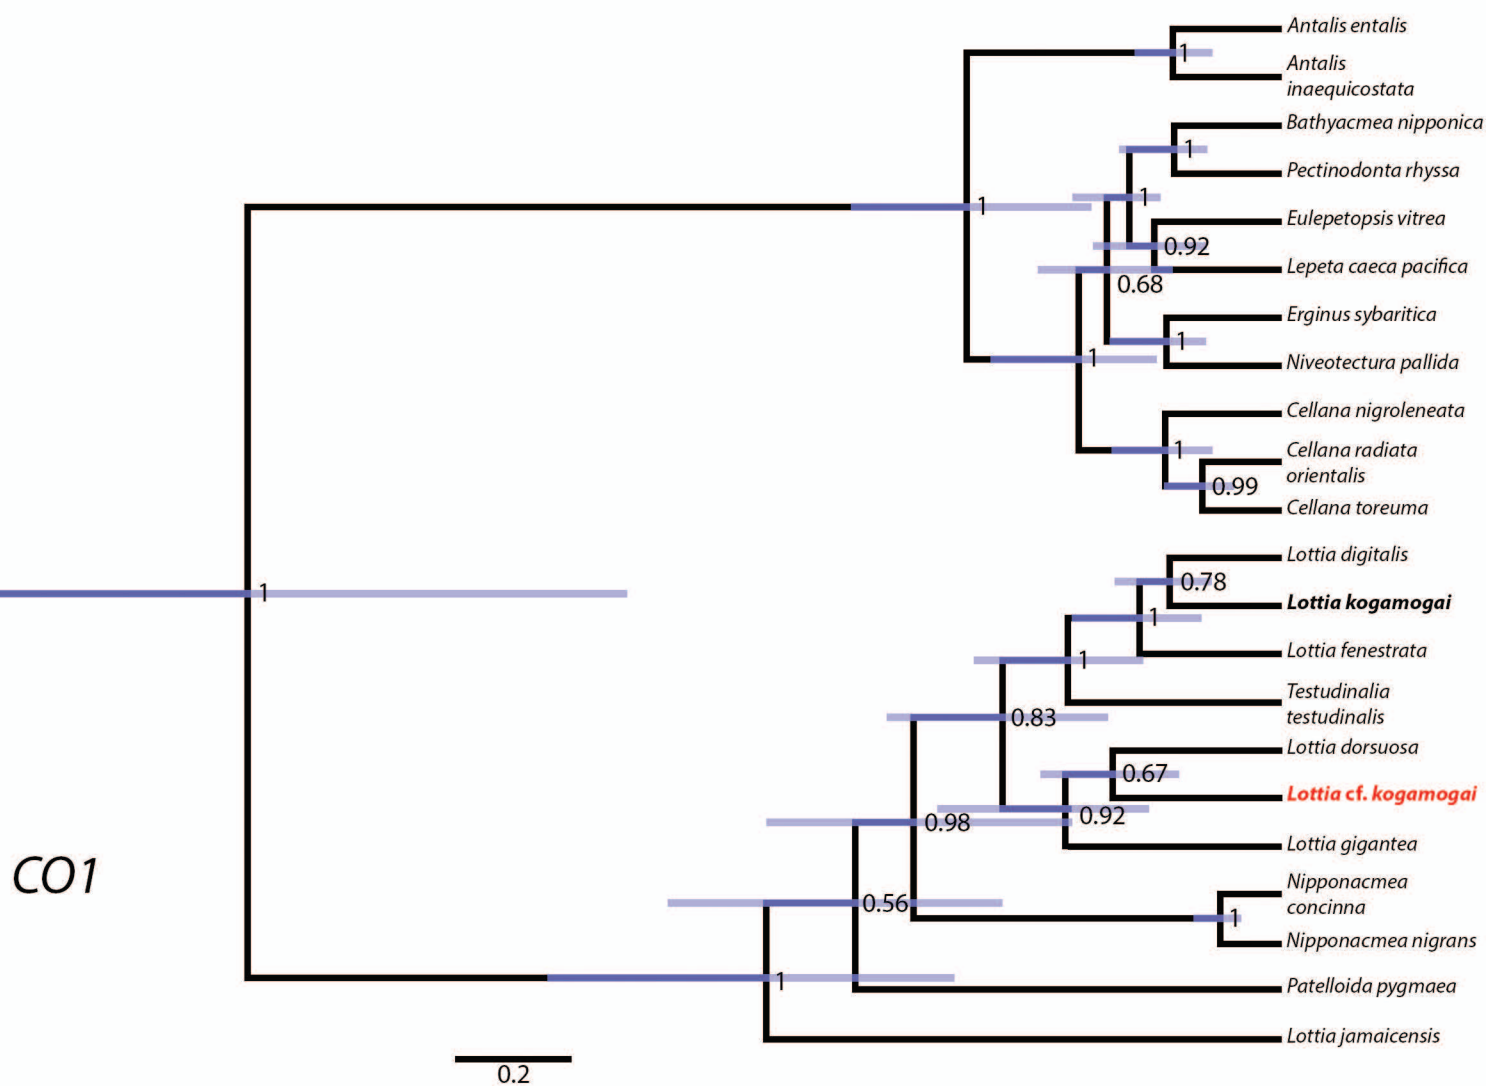

**Figure S1.** Maximum clade credibility (MCC) trees using individual *16S* rRNA and *cytochrome c oxidase* subunit I (*CO1*) mitochondrial markers resulting from BEAST2 Bayesian analysis. *Lottia cf. kogamogai* is indicated in red and *Lottia kogamogai* Sasaki and Okutani, 1994 in bold letters. All clades are shown with their associated 95% confidence intervals (blue bars). The support values are posterior probabilities. Outgroup: *Antalis entalis* (Linnaeus, 1758), *Antalis inaequicostata* (Dautzenberg, 1891). **A.** MCC tree based on the *16S* gene. **B.** MCC tree based on the *CO1* gene.

**Table S2.** Phenotypic distances (sequence divergence) between *16S* rRNA and *cytochrome c oxidase* subunit 1 (*CO1*). Proportion of base substitutions per site between *16S* (above the diagonal) and *CO1* (below the diagonal) sequences are shown. The analysis involved 22 nucleotide sequences. All positions containing gaps and missing data were eliminated. There are a total of 248 (*16S*) and 548 (*CO1*) positions in the final dataset. Calculation performed in MEGA 6 [1].

|                                       | 1     | 2     | 3     | 4     | 5      | 6     | 7     | 8     | 9     | 10    | 11    | 12    | 13    | 14    | 15           | 16           | 17    | 18    | 19    | 20    | 21    | 22    |
|---------------------------------------|-------|-------|-------|-------|--------|-------|-------|-------|-------|-------|-------|-------|-------|-------|--------------|--------------|-------|-------|-------|-------|-------|-------|
| <i>Antalis entalis</i> (1)            | -     | 0.150 | 0.315 | 0.335 | 0.339  | 0.347 | 0.351 | 0.355 | 0.331 | 0.399 | 0.403 | 0.399 | 0.379 | 0.411 | 0.403        | 0.403        | 0.379 | 0.379 | 0.403 | 0.367 | 0.335 | 0.395 |
| <i>Antalis inaequicostata</i> (2)     | 0.171 | -     | 0.302 | 0.306 | 0.290  | 0.294 | 0.327 | 0.355 | 0.306 | 0.395 | 0.411 | 0.403 | 0.387 | 0.419 | 0.391        | 0.399        | 0.383 | 0.379 | 0.403 | 0.351 | 0.310 | 0.395 |
| <i>Bathycypraea nipponica</i> (3)     | 0.262 | 0.297 | -     | 0.262 | 0.25   | 0.254 | 0.254 | 0.234 | 0.246 | 0.355 | 0.347 | 0.355 | 0.343 | 0.391 | 0.351        | 0.347        | 0.355 | 0.331 | 0.347 | 0.323 | 0.218 | 0.347 |
| <i>Cellana nigrolineata</i> (4)       | 0.297 | 0.301 | 0.234 | -     | 0.0726 | 0.077 | 0.222 | 0.234 | 0.214 | 0.319 | 0.315 | 0.310 | 0.315 | 0.339 | 0.331        | 0.323        | 0.335 | 0.323 | 0.327 | 0.315 | 0.198 | 0.323 |
| <i>Cellana radiata orientalis</i> (5) | 0.294 | 0.301 | 0.234 | 0.126 | -      | 0.052 | 0.214 | 0.230 | 0.206 | 0.302 | 0.306 | 0.302 | 0.290 | 0.319 | 0.319        | 0.302        | 0.315 | 0.306 | 0.315 | 0.302 | 0.169 | 0.306 |
| <i>Cellana toreuma</i> (6)            | 0.308 | 0.332 | 0.28  | 0.178 | 0.157  | -     | 0.222 | 0.226 | 0.222 | 0.302 | 0.306 | 0.306 | 0.302 | 0.335 | 0.331        | 0.306        | 0.319 | 0.310 | 0.315 | 0.290 | 0.198 | 0.302 |
| <i>Erginus sybaritica</i> (7)         | 0.262 | 0.276 | 0.185 | 0.161 | 0.175  | 0.224 | -     | 0.242 | 0.226 | 0.290 | 0.282 | 0.282 | 0.298 | 0.319 | 0.302        | 0.286        | 0.298 | 0.286 | 0.302 | 0.310 | 0.242 | 0.302 |
| <i>Eulepetopsis vitrea</i> (8)        | 0.287 | 0.266 | 0.206 | 0.22  | 0.238  | 0.231 | 0.192 | -     | 0.262 | 0.282 | 0.274 | 0.298 | 0.258 | 0.282 | 0.278        | 0.274        | 0.286 | 0.266 | 0.302 | 0.290 | 0.266 | 0.298 |
| <i>Lepeta caeca pacifica</i> (9)      | 0.273 | 0.294 | 0.192 | 0.21  | 0.224  | 0.224 | 0.185 | 0.15  | -     | 0.343 | 0.331 | 0.335 | 0.343 | 0.363 | 0.339        | 0.339        | 0.310 | 0.327 | 0.359 | 0.315 | 0.206 | 0.351 |
| <i>Lottia digitalis</i> (10)          | 0.413 | 0.381 | 0.43  | 0.381 | 0.413  | 0.427 | 0.406 | 0.381 | 0.395 | -     | 0.097 | 0.065 | 0.109 | 0.149 | 0.093        | 0.028        | 0.173 | 0.153 | 0.073 | 0.198 | 0.347 | 0.069 |
| <i>Lottia dorsuosa</i> (11)           | 0.381 | 0.385 | 0.413 | 0.374 | 0.402  | 0.392 | 0.374 | 0.385 | 0.371 | 0.224 | -     | 0.121 | 0.101 | 0.153 | 0.089        | 0.081        | 0.173 | 0.157 | 0.121 | 0.206 | 0.335 | 0.113 |
| <i>Lottia fenestrata</i> (12)         | 0.406 | 0.392 | 0.434 | 0.406 | 0.399  | 0.413 | 0.406 | 0.381 | 0.392 | 0.213 | 0.287 | -     | 0.121 | 0.149 | 0.109        | 0.056        | 0.165 | 0.145 | 0.089 | 0.206 | 0.335 | 0.089 |
| <i>Lottia gigantea</i> (13)           | 0.402 | 0.399 | 0.406 | 0.374 | 0.406  | 0.406 | 0.381 | 0.406 | 0.395 | 0.238 | 0.203 | 0.28  | -     | 0.145 | 0.105        | 0.101        | 0.157 | 0.157 | 0.117 | 0.198 | 0.323 | 0.105 |
| <i>Lottia jamaicensis</i> (14)        | 0.374 | 0.402 | 0.451 | 0.399 | 0.402  | 0.402 | 0.423 | 0.409 | 0.413 | 0.332 | 0.325 | 0.315 | 0.315 | -     | 0.133        | 0.145        | 0.181 | 0.198 | 0.161 | 0.218 | 0.371 | 0.153 |
| <i>Lottia cf. kogamogai</i> (15)      | 0.364 | 0.378 | 0.395 | 0.378 | 0.409  | 0.399 | 0.388 | 0.364 | 0.388 | 0.276 | 0.217 | 0.301 | 0.213 | 0.329 | -            | <b>0.085</b> | 0.173 | 0.161 | 0.109 | 0.198 | 0.339 | 0.117 |
| <i>Lottia kogamogai</i> (16)          | 0.43  | 0.441 | 0.451 | 0.434 | 0.434  | 0.444 | 0.434 | 0.441 | 0.43  | 0.199 | 0.276 | 0.227 | 0.28  | 0.322 | <b>0.311</b> | -            | 0.169 | 0.149 | 0.077 | 0.202 | 0.343 | 0.073 |
| <i>Nipponacmea concinna</i> (17)      | 0.381 | 0.399 | 0.385 | 0.381 | 0.409  | 0.43  | 0.392 | 0.399 | 0.402 | 0.283 | 0.245 | 0.318 | 0.22  | 0.357 | 0.22         | 0.301        | -     | 0.141 | 0.173 | 0.222 | 0.323 | 0.165 |
| <i>Nipponacmea nigrans</i> (18)       | 0.399 | 0.406 | 0.409 | 0.388 | 0.399  | 0.434 | 0.402 | 0.416 | 0.392 | 0.315 | 0.259 | 0.294 | 0.227 | 0.343 | 0.245        | 0.308        | 0.112 | -     | 0.169 | 0.210 | 0.323 | 0.165 |
| <i>Niveotectura pallida</i> (19)      | 0.294 | 0.311 | 0.227 | 0.203 | 0.224  | 0.203 | 0.154 | 0.21  | 0.22  | 0.409 | 0.364 | 0.434 | 0.374 | 0.399 | 0.367        | 0.437        | 0.413 | 0.409 | -     | 0.202 | 0.339 | 0.02  |
| <i>Patelloida pygmaea</i> (20)        | 0.395 | 0.402 | 0.399 | 0.406 | 0.409  | 0.416 | 0.395 | 0.406 | 0.402 | 0.332 | 0.308 | 0.336 | 0.28  | 0.325 | 0.304        | 0.35         | 0.325 | 0.318 | 0.406 | -     | 0.319 | 0.19  |
| <i>Pectinodonta rhyssa</i> (21)       | 0.276 | 0.283 | 0.168 | 0.231 | 0.217  | 0.255 | 0.196 | 0.206 | 0.175 | 0.406 | 0.378 | 0.399 | 0.392 | 0.423 | 0.392        | 0.434        | 0.378 | 0.381 | 0.213 | 0.392 | -     | 0.335 |
| <i>Testudinalia testudinalis</i> (22) | 0.395 | 0.437 | 0.385 | 0.395 | 0.402  | 0.378 | 0.42  | 0.395 | 0.371 | 0.21  | 0.262 | 0.252 | 0.241 | 0.318 | 0.245        | 0.241        | 0.28  | 0.297 | 0.42  | 0.308 | 0.395 | -     |

**16S**

**CO1**

[1] Tamura K, Stecher G, Peterson D, Filipski A, Kumar S (2013) MEGA6: Molecular evolutionary genetics analysis version 6.0. *Mol Biol Evol* **30**: 2725-2729.

**Table S3.** Estimates of evolutionary divergence using the Jukes-Cantor model [1] between *16S* rRNA and *cytochrome c oxidase* subunit 1 (*CO1*). The number of base substitutions per site between *16S* (above the diagonal) and *CO1* (below the diagonal) sequences are shown. The analysis involved 22 nucleotide sequences. All positions containing gaps and missing data were eliminated. There are a total of 248 (*16S*) and 548 (*CO1*) positions in the final dataset. Evolutionary analyses were conducted in MEGA6 [2].

|                                       | 1     | 2     | 3     | 4     | 5     | 6     | 7     | 8     | 9     | 10    | 11    | 12    | 13    | 14    | 15           | 16          | 17    | 18    | 19    | 20    | 21    | 22    |
|---------------------------------------|-------|-------|-------|-------|-------|-------|-------|-------|-------|-------|-------|-------|-------|-------|--------------|-------------|-------|-------|-------|-------|-------|-------|
| <i>Antalis entalis</i> (1)            | -     | 0.166 | 0.408 | 0.443 | 0.451 | 0.465 | 0.473 | 0.481 | 0.436 | 0.57  | 0.579 | 0.57  | 0.528 | 0.596 | 0.579        | 0.579       | 0.528 | 0.528 | 0.579 | 0.504 | 0.443 | 0.561 |
| <i>Antalis inaequicostata</i> (2)     | 0.195 | -     | 0.387 | 0.394 | 0.367 | 0.374 | 0.429 | 0.481 | 0.394 | 0.561 | 0.596 | 0.579 | 0.544 | 0.614 | 0.553        | 0.57        | 0.536 | 0.528 | 0.579 | 0.473 | 0.401 | 0.561 |
| <i>Bathyacmaea nipponica</i> (3)      | 0.323 | 0.378 | -     | 0.322 | 0.304 | 0.31  | 0.31  | 0.28  | 0.298 | 0.481 | 0.465 | 0.481 | 0.458 | 0.553 | 0.473        | 0.465       | 0.481 | 0.436 | 0.465 | 0.422 | 0.257 | 0.465 |
| <i>Cellana nigrolineata</i> (4)       | 0.378 | 0.384 | 0.281 | -     | 0.076 | 0.081 | 0.263 | 0.28  | 0.252 | 0.415 | 0.408 | 0.401 | 0.408 | 0.451 | 0.436        | 0.422       | 0.443 | 0.422 | 0.429 | 0.408 | 0.229 | 0.422 |
| <i>Cellana radiata orientalis</i> (5) | 0.373 | 0.384 | 0.281 | 0.138 | -     | 0.054 | 0.252 | 0.274 | 0.24  | 0.387 | 0.394 | 0.387 | 0.367 | 0.415 | 0.415        | 0.387       | 0.408 | 0.394 | 0.408 | 0.387 | 0.192 | 0.394 |
| <i>Cellana toreuma</i> (6)            | 0.396 | 0.439 | 0.35  | 0.204 | 0.177 | -     | 0.263 | 0.269 | 0.263 | 0.387 | 0.394 | 0.394 | 0.387 | 0.443 | 0.436        | 0.394       | 0.415 | 0.401 | 0.408 | 0.367 | 0.229 | 0.387 |
| <i>Erginus sybaritica</i> (7)         | 0.323 | 0.345 | 0.213 | 0.181 | 0.199 | 0.266 | -     | 0.292 | 0.269 | 0.367 | 0.354 | 0.354 | 0.38  | 0.415 | 0.387        | 0.361       | 0.38  | 0.361 | 0.387 | 0.401 | 0.292 | 0.387 |
| <i>Eulepetopsis vitrea</i> (8)        | 0.361 | 0.328 | 0.241 | 0.261 | 0.286 | 0.276 | 0.222 | -     | 0.322 | 0.354 | 0.341 | 0.38  | 0.316 | 0.354 | 0.348        | 0.341       | 0.361 | 0.329 | 0.387 | 0.367 | 0.329 | 0.38  |
| <i>Lepeta caeca pacifica</i> (9)      | 0.339 | 0.373 | 0.222 | 0.246 | 0.266 | 0.266 | 0.213 | 0.168 | -     | 0.458 | 0.436 | 0.443 | 0.458 | 0.496 | 0.451        | 0.451       | 0.401 | 0.429 | 0.488 | 0.408 | 0.24  | 0.473 |
| <i>Lottia digitalis</i> (10)          | 0.599 | 0.532 | 0.639 | 0.532 | 0.599 | 0.631 | 0.584 | 0.532 | 0.561 | -     | 0.104 | 0.067 | 0.118 | 0.166 | 0.099        | 0.029       | 0.197 | 0.171 | 0.076 | 0.229 | 0.465 | 0.072 |
| <i>Lottia dorsuosa</i> (11)           | 0.532 | 0.539 | 0.599 | 0.518 | 0.576 | 0.554 | 0.518 | 0.539 | 0.511 | 0.266 | -     | 0.132 | 0.108 | 0.171 | 0.094        | 0.085       | 0.197 | 0.176 | 0.132 | 0.24  | 0.443 | 0.122 |
| <i>Lottia fenestrata</i> (12)         | 0.584 | 0.554 | 0.647 | 0.567 | 0.569 | 0.599 | 0.584 | 0.532 | 0.554 | 0.251 | 0.361 | -     | 0.132 | 0.166 | 0.118        | 0.059       | 0.187 | 0.161 | 0.094 | 0.24  | 0.443 | 0.094 |
| <i>Lottia gigantea</i> (13)           | 0.576 | 0.569 | 0.584 | 0.518 | 0.584 | 0.584 | 0.532 | 0.584 | 0.561 | 0.286 | 0.236 | 0.35  | -     | 0.161 | 0.113        | 0.108       | 0.176 | 0.176 | 0.127 | 0.229 | 0.422 | 0.113 |
| <i>Lottia jamaicensis</i> (14)        | 0.518 | 0.576 | 0.69  | 0.569 | 0.576 | 0.576 | 0.623 | 0.591 | 0.599 | 0.439 | 0.426 | 0.408 | 0.408 | -     | 0.146        | 0.161       | 0.208 | 0.229 | 0.182 | 0.257 | 0.512 | 0.171 |
| <i>Lottia cf. kogamogai</i> (15)      | 0.497 | 0.525 | 0.561 | 0.525 | 0.591 | 0.569 | 0.547 | 0.497 | 0.547 | 0.345 | 0.256 | 0.384 | 0.251 | 0.432 | -            | <b>0.09</b> | 0.197 | 0.182 | 0.118 | 0.229 | 0.451 | 0.127 |
| <i>Lottia kogamogai</i> (16)          | 0.639 | 0.664 | 0.69  | 0.647 | 0.647 | 0.673 | 0.647 | 0.664 | 0.639 | 0.232 | 0.345 | 0.271 | 0.35  | 0.42  | <b>0.402</b> | -           | 0.192 | 0.166 | 0.081 | 0.235 | 0.458 | 0.076 |
| <i>Nipponacmea concinna</i> (17)      | 0.532 | 0.569 | 0.539 | 0.532 | 0.591 | 0.639 | 0.554 | 0.569 | 0.576 | 0.356 | 0.296 | 0.414 | 0.261 | 0.484 | 0.261        | 0.384       | -     | 0.156 | 0.197 | 0.263 | 0.422 | 0.187 |
| <i>Nipponacmea nigrans</i> (18)       | 0.569 | 0.584 | 0.591 | 0.547 | 0.569 | 0.647 | 0.576 | 0.607 | 0.554 | 0.408 | 0.317 | 0.373 | 0.271 | 0.458 | 0.296        | 0.396       | 0.121 | -     | 0.192 | 0.246 | 0.422 | 0.187 |
| <i>Niveotectura pallida</i> (19)      | 0.373 | 0.402 | 0.271 | 0.236 | 0.266 | 0.236 | 0.172 | 0.246 | 0.261 | 0.591 | 0.497 | 0.647 | 0.518 | 0.569 | 0.504        | 0.656       | 0.599 | 0.591 | -     | 0.235 | 0.451 | 0.02  |
| <i>Patelloida pygmaea</i> (20)        | 0.561 | 0.576 | 0.569 | 0.584 | 0.591 | 0.607 | 0.561 | 0.584 | 0.576 | 0.439 | 0.396 | 0.445 | 0.35  | 0.426 | 0.39         | 0.471       | 0.426 | 0.414 | 0.584 | -     | 0.415 | 0.218 |
| <i>Pectinodonta rhyssa</i> (21)       | 0.345 | 0.356 | 0.19  | 0.276 | 0.256 | 0.312 | 0.227 | 0.241 | 0.199 | 0.584 | 0.525 | 0.569 | 0.554 | 0.623 | 0.554        | 0.647       | 0.525 | 0.532 | 0.251 | 0.554 | -     | 0.443 |
| <i>Testudinalia testudinalis</i> (22) | 0.561 | 0.656 | 0.539 | 0.561 | 0.576 | 0.525 | 0.615 | 0.561 | 0.511 | 0.246 | 0.323 | 0.307 | 0.291 | 0.414 | 0.296        | 0.291       | 0.35  | 0.378 | 0.615 | 0.396 | 0.561 | -     |

**16S**

**CO1**

[1] Jukes TH, Cantor CR (1969) Evolution of protein molecules. In: Munro HN (ed), Mammalian Protein Metabolism. Academic Press, New York, pp 21-132.

[2] Tamura K, Stecher G, Peterson D, Filipski A, Kumar S (2013) MEGA6: Molecular evolutionary genetics analysis version 6.0. Mol Biol Evol **30**: 2725-2729.
